# Supplementary material
Source: PubMed Central journal article supplement (PMC1317913)

wild type

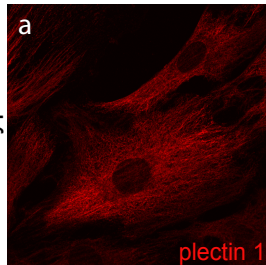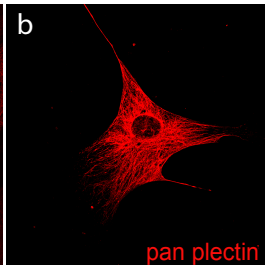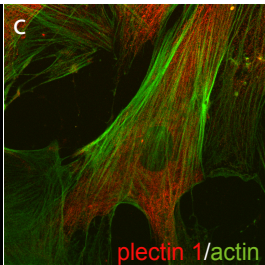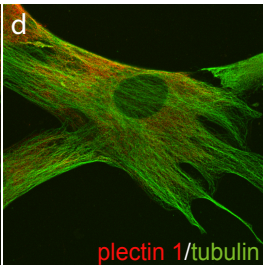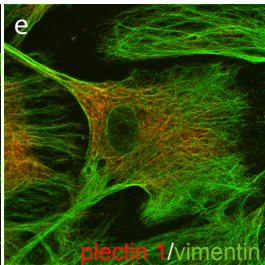

plectin 1 (-/-)

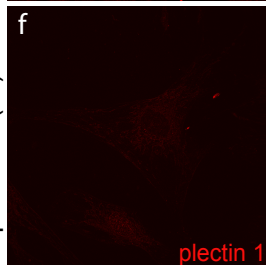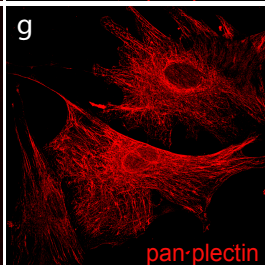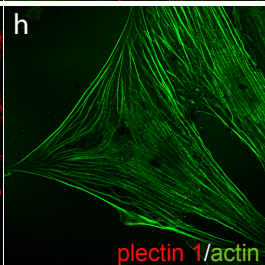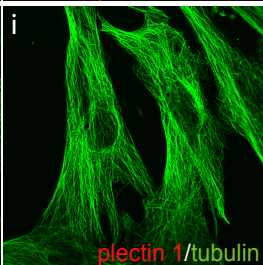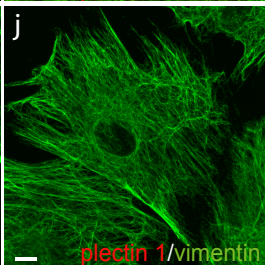

Supplement: pnas_0505380102_2.pdf [file pnas_0505380102_2.pdf]
